# Supplementary material for: Where Are We Now? Feeds, Feeding Systems and Current Knowledge of UK Horse Owners When Feeding Haylage to Their Horses
Source: MDPI journal article supplement (doi:10.3390/ani13081280), 2023-04-07
Supplement: s1 [file s1]

Question 1: What age are you?

15-25

26-30

31-40

41-50

51+

Question 2: What equine related education have you had? (tick as many as apply)

None

Industry experience

Pony club/Riding club

BHS Qualifications

Diploma/Degree

Masters/PHD

Question 3: How many horses do you have in each age bracket? (tick as many as apply) For the following questions, if you have more than one horse and treat them differently please tick the number of horses that each answer relates to, if you only have one then just tick 1 to which ever answer you chose.

| Age         | Number of horses |   |   |   |    |
|-------------|------------------|---|---|---|----|
|             | 1                | 2 | 3 | 4 | 5+ |
| 0-5 years   |                  |   |   |   |    |
| 6-14 years  |                  |   |   |   |    |
| 15-20 years |                  |   |   |   |    |
| 21+ years   |                  |   |   |   |    |

Question 4: How big is/are your horse/s?

| Height (hh)         | Number of horses |   |   |   |    |
|---------------------|------------------|---|---|---|----|
|                     | 1                | 2 | 3 | 4 | 5+ |
| Small <14.2         |                  |   |   |   |    |
| Medium<br>14.2-16.2 |                  |   |   |   |    |
| Large<br>>16.2      |                  |   |   |   |    |

Question 5:

Is/are your horse/s currently stabled?

| Amount of time         | Number of horses |   |   |   |    |
|------------------------|------------------|---|---|---|----|
|                        | 1                | 2 | 3 | 4 | 5+ |
| During/part of the day |                  |   |   |   |    |
| At night               |                  |   |   |   |    |
| All the time           |                  |   |   |   |    |
| Never                  |                  |   |   |   |    |

Question 6: How many times a day do you feed meals to your horse/s?

| Number of meals a day | Number of horses |   |   |   |    |
|-----------------------|------------------|---|---|---|----|
|                       | 1                | 2 | 3 | 4 | 5+ |
| Never                 |                  |   |   |   |    |
| Once                  |                  |   |   |   |    |
| Twice                 |                  |   |   |   |    |
| 3 times               |                  |   |   |   |    |
| 4+ times              |                  |   |   |   |    |

Question 7: How often is/are you horse/s ridden, lunged, worked or exercised a week?

| Number of times a week | Number of horses |   |   |   |    |
|------------------------|------------------|---|---|---|----|
|                        | 1                | 2 | 3 | 4 | 5+ |
| Retired/pet            |                  |   |   |   |    |
| 1-2 times              |                  |   |   |   |    |
| 3-5 times              |                  |   |   |   |    |
| 6-7 times              |                  |   |   |   |    |

Question 8: What is your main discipline?

☐ Hacking and pleasure riding  
☐ Showjumping  
☐ Dressage  
☐ Eventing  
☐ Polo  
☐ Racing  
☐ Hunting  
☐ Western  
☐ Driving  
☐ Showing  
☐ Other (please specify)

Question 9: Which forage do you feed your horse/s?

☐ Hay  
☐ Haylage  
☐ Silage  
☐ Other (please specify)

Question 10: Do you weigh out your forage?

☐ Yes  
☐ No

10 a. If yes, how much?

☐ 0-5kg  
☐ 5-10kg  
☐ 10-15kg+

Question 11: How do you feed your forage?

- Net
- Floor
- Hay bar/rack
- Other (please specify)

Question 12: Have you ever had your forage analysed?

- Yes
- No

12 a. If no, why not?

- Have not heard about forage analysis
- Don't see a need for forage analysis
- Haven't got around to it/time limitations
- Cost
- Yard provides forage
- Other (please specify)

Question 13: What fibre feed do you feed your horse/s?

- Chaff
- Alfalfa
- Sugar beet
- Complete chaff feed
- Fast fibre
- None
- Other (please specify)

Question 14: Do you measure out your fibre feed?

- Yes
- No
- Don't feed one

14 a. If yes, how?

- Round scoop
- Square scoop
- Accurate scales measurement
- By eye
- Handfuls
- Other (please specify)

Question 15: What concentrate do you feed your horse/s?

- Cereals (oats/barley/maize, whole or rolled)
- High fibre nuts
- Cereal based course mix
- Compound nuts
- Grass nut
- Rice bran

Balancer  
None  
Other (please specify)

Question 16: Do you measure you concentrate?

Yes  
No  
Don't feed one

16 a. If yes, how?

Round scoop  
Square scoop  
Accurate scales measurement  
By eye  
Handfuls  
Other (please specify)

Question 17: Do you stick to a particular brand of fibre feed?

Yes  
No

17a. If yes, please rank the following reasons as to why, with 1 being the most important and 7 being the least.

| Reason                               | Ranking |   |   |   |   |   |   |
|--------------------------------------|---------|---|---|---|---|---|---|
|                                      | 1       | 2 | 3 | 4 | 5 | 6 | 7 |
| Loyalty                              |         |   |   |   |   |   |   |
| Sponsorship                          |         |   |   |   |   |   |   |
| Price                                |         |   |   |   |   |   |   |
| Feed composition                     |         |   |   |   |   |   |   |
| Nutritional advice                   |         |   |   |   |   |   |   |
| Keep the feed regular for your horse |         |   |   |   |   |   |   |
| Feed works well for your horse       |         |   |   |   |   |   |   |

Question 18: Do you stick to a particular brand of concentrate feed?

Yes  
No

18 a. If yes, please rank the following reasons as to why, with 1 being the most important and 7 being the least.

| Reason      | Ranking |   |   |   |   |   |   |
|-------------|---------|---|---|---|---|---|---|
|             | 1       | 2 | 3 | 4 | 5 | 6 | 7 |
| Loyalty     |         |   |   |   |   |   |   |
| Sponsorship |         |   |   |   |   |   |   |

|                                      |  |  |  |  |  |  |  |
|--------------------------------------|--|--|--|--|--|--|--|
| Price                                |  |  |  |  |  |  |  |
| Feed composition                     |  |  |  |  |  |  |  |
| Nutritional advice                   |  |  |  |  |  |  |  |
| Keep the feed regular for your horse |  |  |  |  |  |  |  |
| Feed works well for your horse       |  |  |  |  |  |  |  |

Question 19: Do you seek nutritional advice prior to purchasing any form of horse feed? (tick as many as apply)

Family  
 Friends  
 Nutritionist  
 Instructor  
 Yard manager  
 Vet  
 Internet forms  
 None

Question 20: Do you feed supplements to you horse/s?

Yes  
 No

20 a. If yes, why?

Prevention  
 Health based condition  
 Advertisements make products look attractive  
 Balance the diet  
 Other (please specify)

20 b. Do you seek advice on what supplements to feed?

Family  
 Friends  
 Nutritionist  
 Instructor  
 Yard manager  
 Vet  
 Internet forms  
 None

Question 21: Do you feel your feeding practices have changed?

Yes, over the last 5 years  
 Yes, over the last 5-10 years  
 Yes, over the last 10+ years  
 Not changed

21 a. Please rank why have your feeding practices changed from most important (1) to least important (7)

| Reason                                                  | Ranking |   |   |   |   |   |   |
|---------------------------------------------------------|---------|---|---|---|---|---|---|
|                                                         | 1       | 2 | 3 | 4 | 5 | 6 | 7 |
| More education/research available                       |         |   |   |   |   |   |   |
| Wider range of feed                                     |         |   |   |   |   |   |   |
| Less time available to spend with horse                 |         |   |   |   |   |   |   |
| Cost                                                    |         |   |   |   |   |   |   |
| Different horses' needs                                 |         |   |   |   |   |   |   |
| Higher competition level/more energy needs of the horse |         |   |   |   |   |   |   |
| Convenience of getting the feed                         |         |   |   |   |   |   |   |

21 b. How have your feeding practices changed?

More forage

Less forage

More concentrate

Less concentrate

Different feed types

Other (please specify)

Please add any additional comments you may have

Thank you for taking part in my survey
